# Supplementary material for: Kinetics of imidazole propionate from orally delivered histidine in mice and humans
Source: PubMed Central journal article supplement — NPJ Biofilms Microbiomes. 2024 Nov 4;10:118. doi: 10.1038/s41522-024-00592-8 (PMC11535228; doi:10.1038/s41522-024-00592-8), 2024-11-04
Supplement: 41522_2024_592_MOESM1_ESM.pdf [file 41522_2024_592_MOESM1_ESM.pdf]

## Supplemental Tables and Figures

### Supplementary Tables

| Ingredient                  | Low Histidine Diet | Normal Histidine Diet | High Histidine Diet |
|-----------------------------|--------------------|-----------------------|---------------------|
| L-Histidine (g)             | 1.08               | 4.6                   | 21                  |
| L-Histidine (g/kg)          | 1.28               | 5.47                  | 25                  |
| Protein (g)                 | 175.4              | 178.9                 | 195.3               |
| Protein (kcal)              | 7.02               | 7.16                  | 7.18                |
| Protein (%/total kcal)      | 18                 | 18                    | 20                  |
| Carbohydrate (g)            | 349.1              | 345.6                 | 329.2               |
| Carbohydrate (kcal)         | 13.96              | 13.82                 | 13.17               |
| Carbohydrate (%/total kcal) | 36                 | 35                    | 34                  |
| Fat (g)                     | 202.5              | 202.5                 | 202.5               |
| Fat (kcal)                  | 18.23              | 18.23                 | 18.23               |
| Fat (%/total kcal)          | 46                 | 46                    | 46                  |

**Supplementary Table 1.** Overview macronutrients in murine diets. Kcal: kilocalories, g: grams

| Control                           | Study visit      |                  |         |                  |         |                  |         |
|-----------------------------------|------------------|------------------|---------|------------------|---------|------------------|---------|
|                                   | Baseline         | 2 weeks          | p_value | Post AB          | p_value | Post recovery    | p_value |
| n                                 | 19               | 19               |         | 19               |         | 19               |         |
| BMI (kg/m <sup>2</sup> )          | 25.49 (2.75)     | 25.40 (2.75)     | 0.916   | 25.49 (2.80)     | 0.998   | 25.28 (2.71)     | 0.81    |
| Waist/Hip ratio                   | 0.90 (0.05)      | 0.90 (0.05)      | 0.837   | 0.90 (0.05)      | 0.974   | 0.90 (0.06)      | 0.90    |
| Weight (kg)                       | 72.95 (13.13)    | 72.72 (13.43)    | 0.957   | 64.07 (41.75)    | 0.382   | 72.34 (12.93)    | 0.89    |
| REE (kcal)                        | 1362.11 (247.70) | 1361.93 (224.05) | 0.998   | 1286.69 (194.65) | 0.304   | 1305.53 (303.93) | 0.53    |
| Total body fat (%)                | 27.16 (7.61)     | 27.87 (8.08)     | 0.782   | 20.97 (29.94)    | 0.401   | 12.79 (40.11)    | 0.14    |
| eGFR (mL/min/1.73m <sup>2</sup> ) | 83.56 (7.11)     | 83.94 (6.09)     | 0.861   | 84.94 (6.53)     | 0.546   | 86.78 (4.14)     | 0.106   |
|                                   |                  |                  |         |                  |         |                  |         |
| Type 2 diabetes                   | Study visit      |                  |         |                  |         |                  |         |
|                                   | Baseline         | 2 weeks          | p_value | Post AB          | p_value | Post recovery    | p_value |
| n                                 | 20               | 20               |         | 20               |         | 20               |         |
| BMI (kg/m <sup>2</sup> )          | 29.56 (2.87)     | 29.32 (3.29)     | 0.806   | 29.32 (2.74)     | 0.787   | 21.86 (32.36)    | 0.295   |
| Waist/Hip ratio                   | 0.98 (0.08)      | 1.76 (3.13)      | 0.287   | 1.00 (0.08)      | 0.592   | -4.30 (22.93)    | 0.322   |
| Weight (kg)                       | 87.08 (15.01)    | 66.42 (58.31)    | 0.133   | 86.17 (15.04)    | 0.850   | 68.02 (59.05)    | 0.170   |
| REE (kcal)                        | 1549.93 (262.13) | 1555.99 (306.33) | 0.948   | 1546.66 (260.33) | 0.969   | 1376.12 (546.96) | 0.222   |
| Total body fat (%)                | 32.42 (7.18)     | 26.53 (30.50)    | 0.407   | 25.90 (30.62)    | 0.360   | 20.43 (41.23)    | 0.208   |
| eGFR (mL/min/1.73m <sup>2</sup> ) | 82.35 (14.10)    | 84.26 (12.56)    | 0.658   | 80.50 (15.49)    | 0.695   | 82.39 (14.14)    | 0.993   |

**Supplementary Table 2.** Anthropometric and biochemical values per visit. Data displayed as mean ±SD or %. t-test for significance. REE: resting energy expenditure . eGFR estimated Glomerular Filtration Rate,

## Supplementary Figures

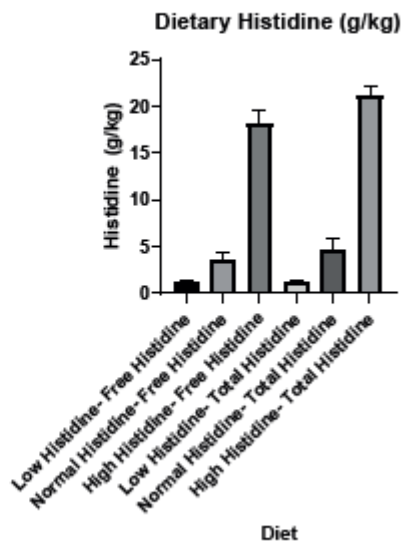

Supplementary Figure 1. Depiction of histidine content in murine diets.

A.

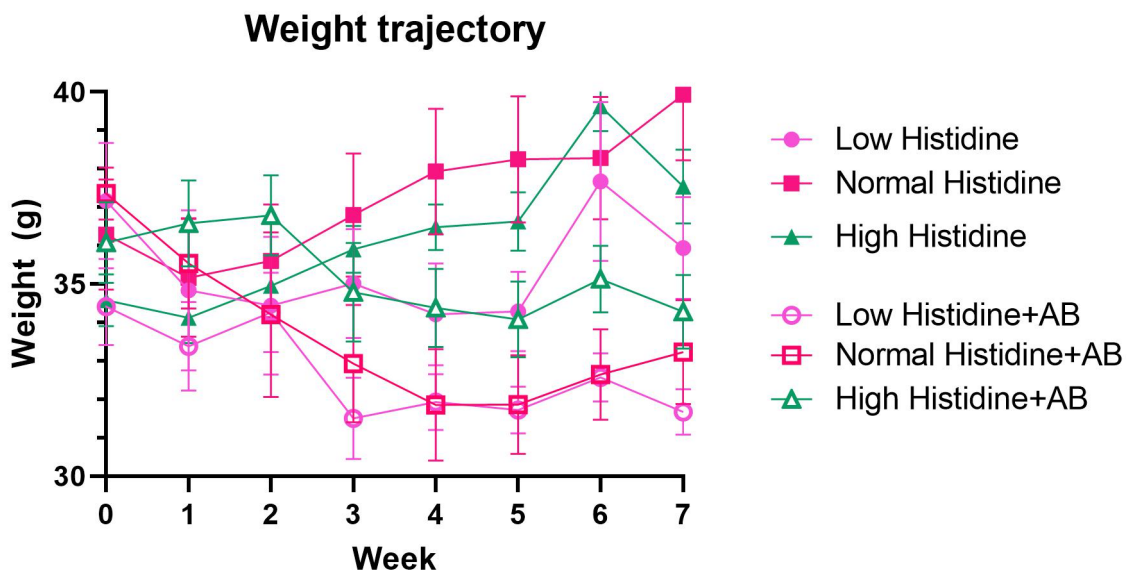

| Week 0 | Week 1 | Week 2 | Week 3 | Week 4                                 | Week 5                                  | Week 6                                 |
|--------|--------|--------|--------|----------------------------------------|-----------------------------------------|----------------------------------------|
| NS     | NS     | NS     | NS     | * Normal Histidine-Low Histidine+AB    | ** Normal Histidine-Low Histidine+AB    | * Normal Histidine-Low Histidine+AB    |
|        |        |        |        | * Normal Histidine-Normal Histidine+AB | ** Normal Histidine-Normal Histidine+AB | * Normal Histidine-Normal Histidine+AB |
|        |        |        |        | * High Histidine-Normal Histidine+AB   | ** High Histidine-Normal Histidine+AB   | * High Histidine-Normal Histidine+AB   |
|        |        |        |        |                                        | * High Histidine-Low Histidine+AB       | * High Histidine-Low Histidine+AB      |
|        |        |        |        |                                        | * Low Histidine-Normal Histidine        |                                        |
|        |        |        |        |                                        | * Normal Histidine-High Histidine+AB    |                                        |

B.

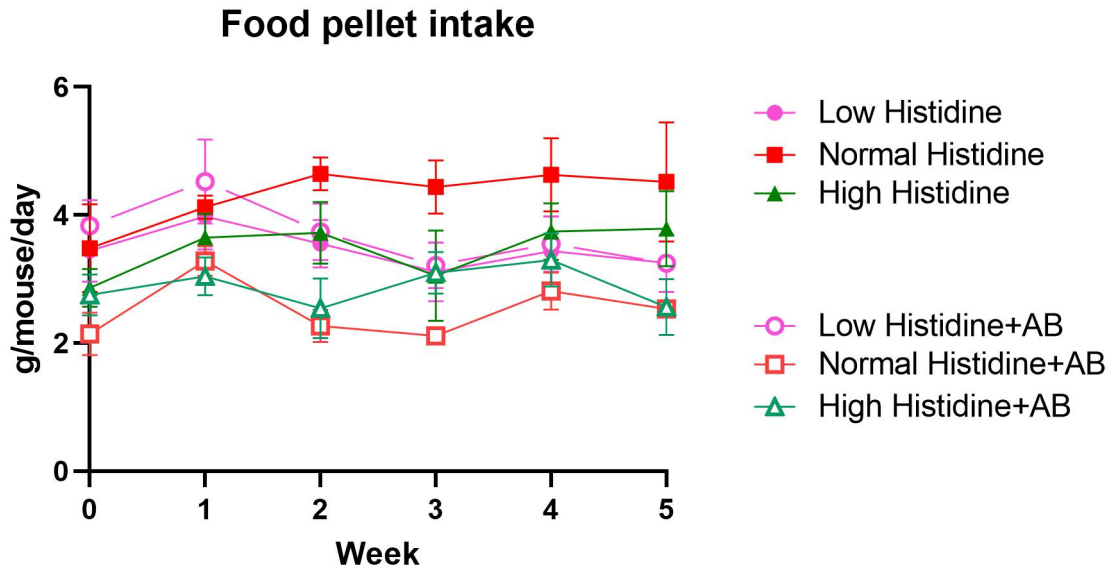

| Week 0 | Week 1 | Week 2                                                                           | Week 3                                                                                                                                                                                              | Week 4                               | Week 5                                                                                                                                                     |
|--------|--------|----------------------------------------------------------------------------------|-----------------------------------------------------------------------------------------------------------------------------------------------------------------------------------------------------|--------------------------------------|------------------------------------------------------------------------------------------------------------------------------------------------------------|
| NS     | NS     | ** Normal Histidine-Normal Histidine+AB<br>** Normal Histidine-High Histidine+AB | ** Normal Histidine-Normal Histidine+AB<br>** Normal Histidine-High Histidine+AB<br>* Normal Histidine-Low Histidine+AB<br>* Low Histidine-Normal Histidine<br>* High Histidine-Normal Histidine+AB | * High Histidine-Normal Histidine+AB | * Normal Histidine-Normal Histidine+AB<br>* Normal Histidine-High Histidine+AB<br>* Low Histidine-Normal Histidine+AB<br>* Low Histidine-High Histidine+AB |

C.

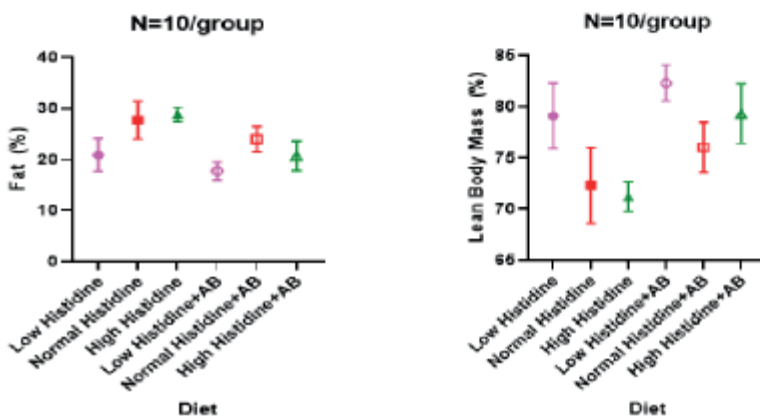

**Supplementary Figure 2.** Overview measurements during the study. A. Weigh trajectory B. Food pellet intake C. body fat %. Linear mixed effect model with FDR correction. Mouse ID as random effect and diet as fixed effect.

A.

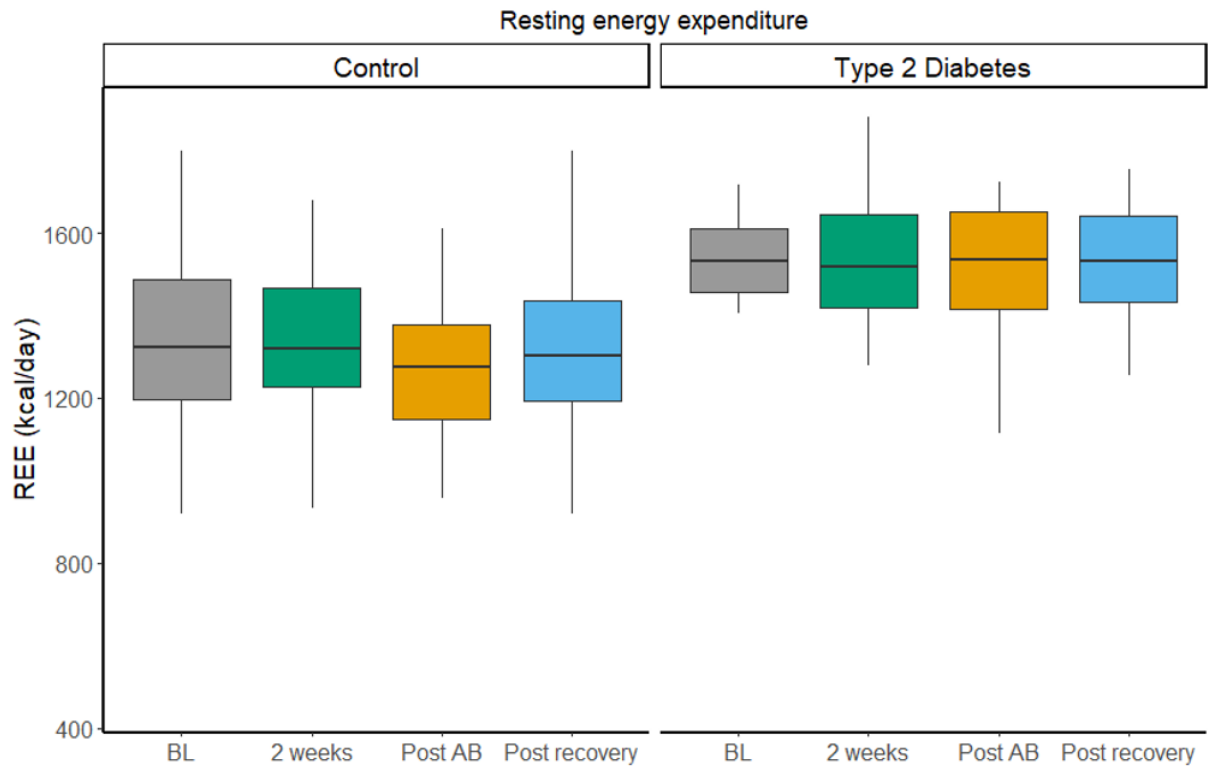

B.

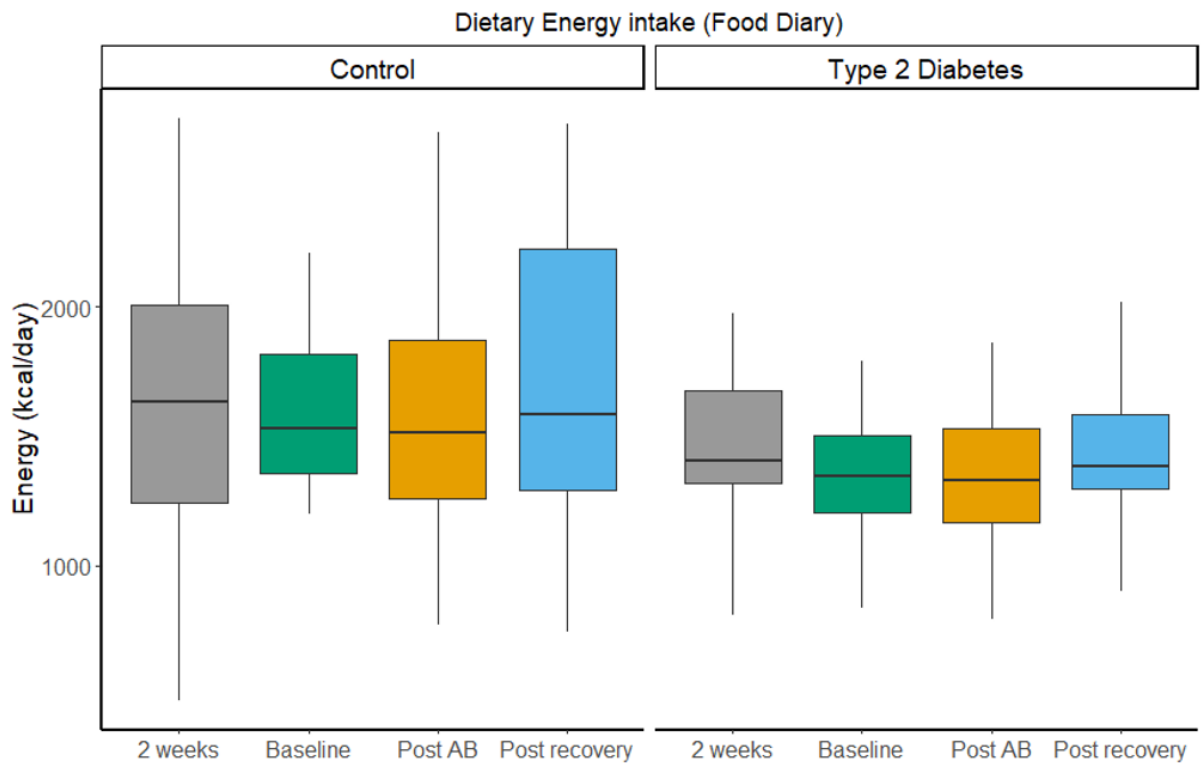

**Supplementary Figure 3.** Overview energy parameters per visit. A. Resting energy measured by indirect calorimetry. B. Dietary Energy intake measured by food diaries. Paired wilcox testing. FDR corrected p values.

A.

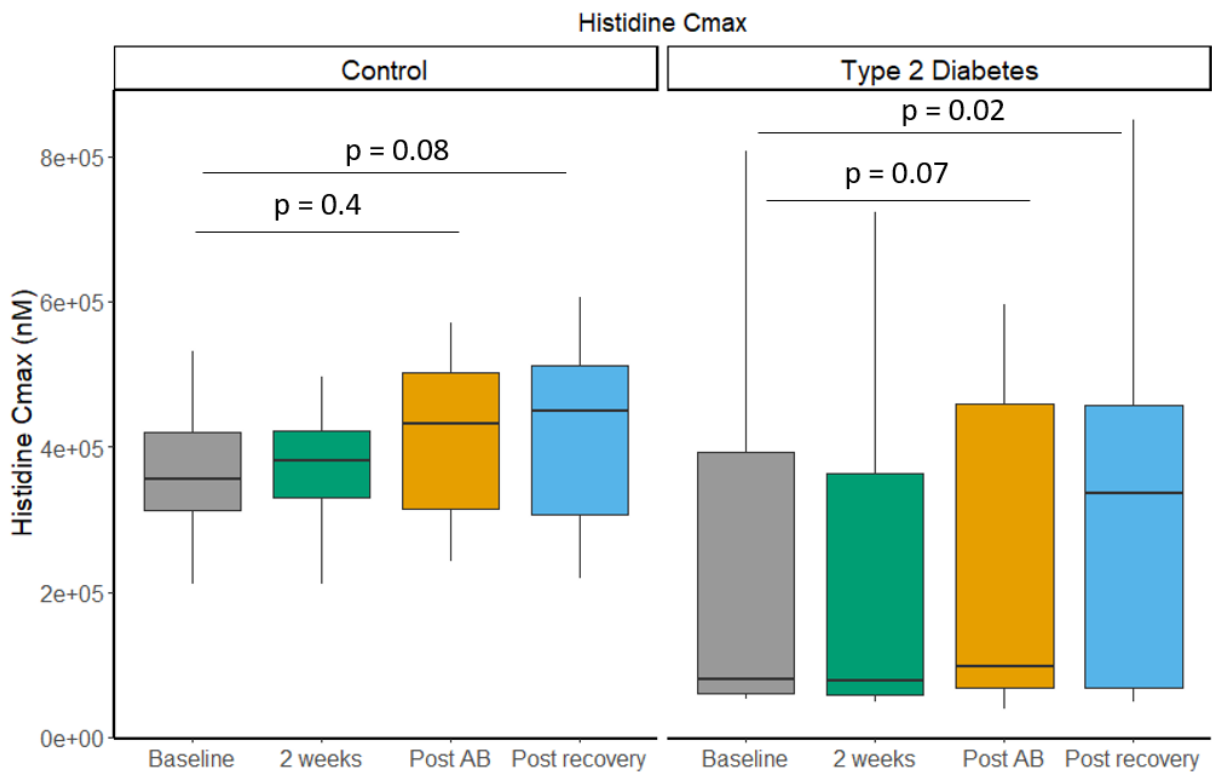

B.

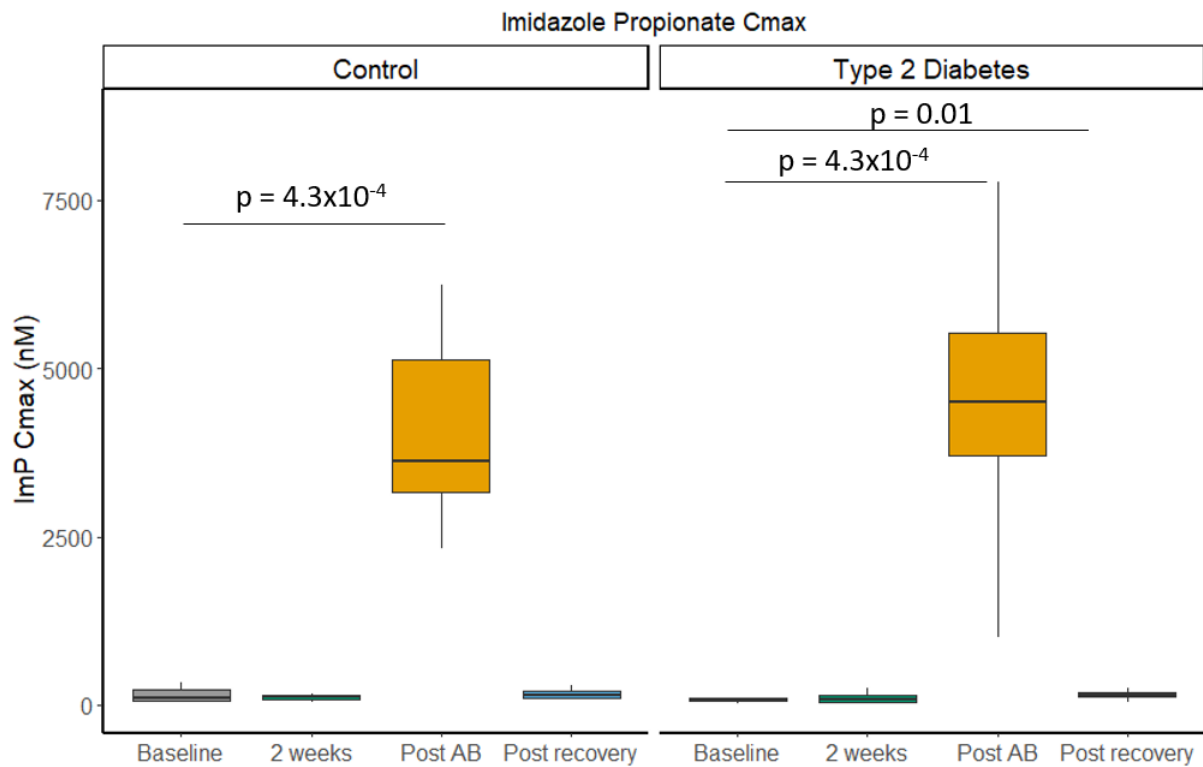

C.

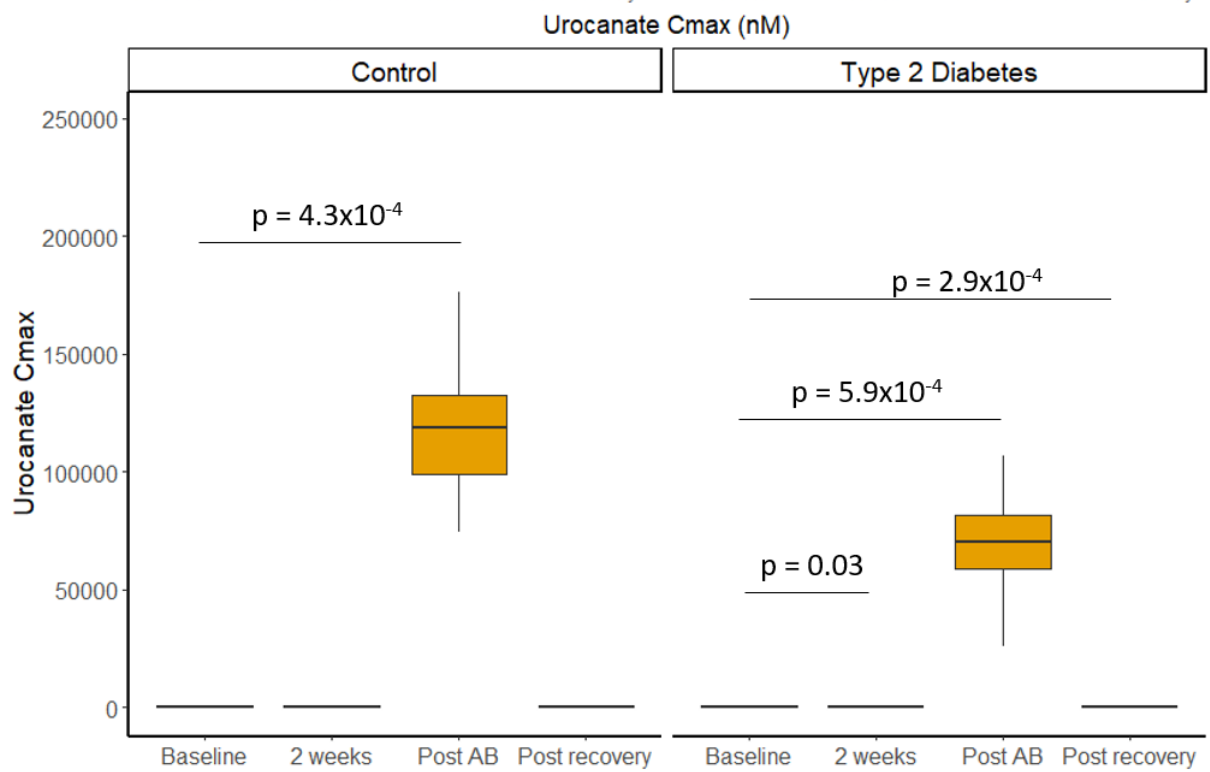

**Supplementary Figure 4.** Metabolite Cmax concentrations. A. Histidine Cmax. B. Imidazole Propionate Cmax C. Urocanate Cmax. Paired wilcox testing. FDR corrected p values.

A.

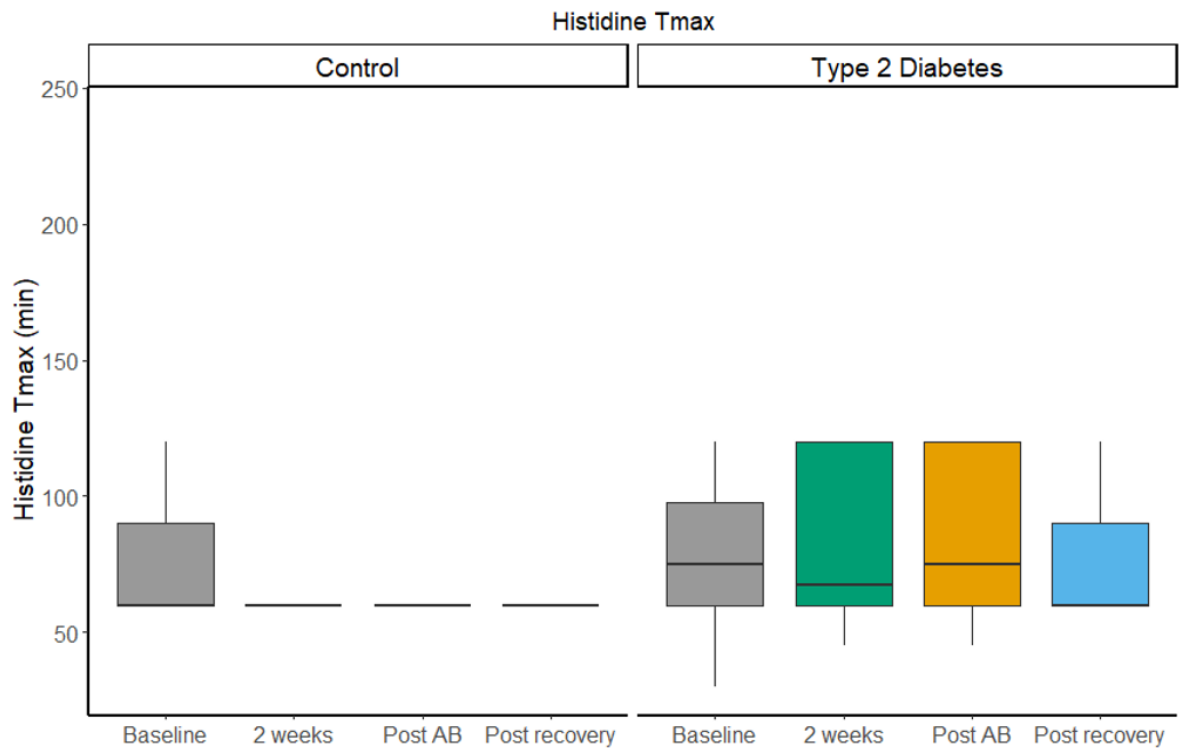

B.

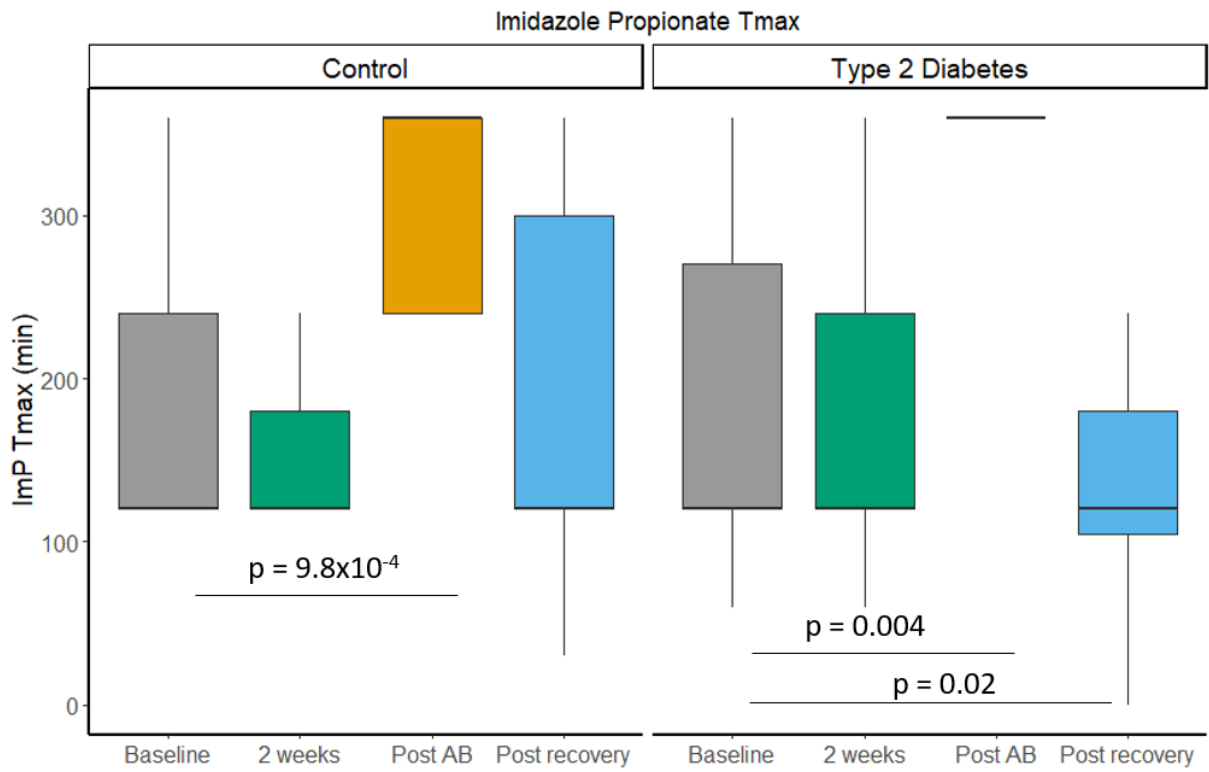

C.

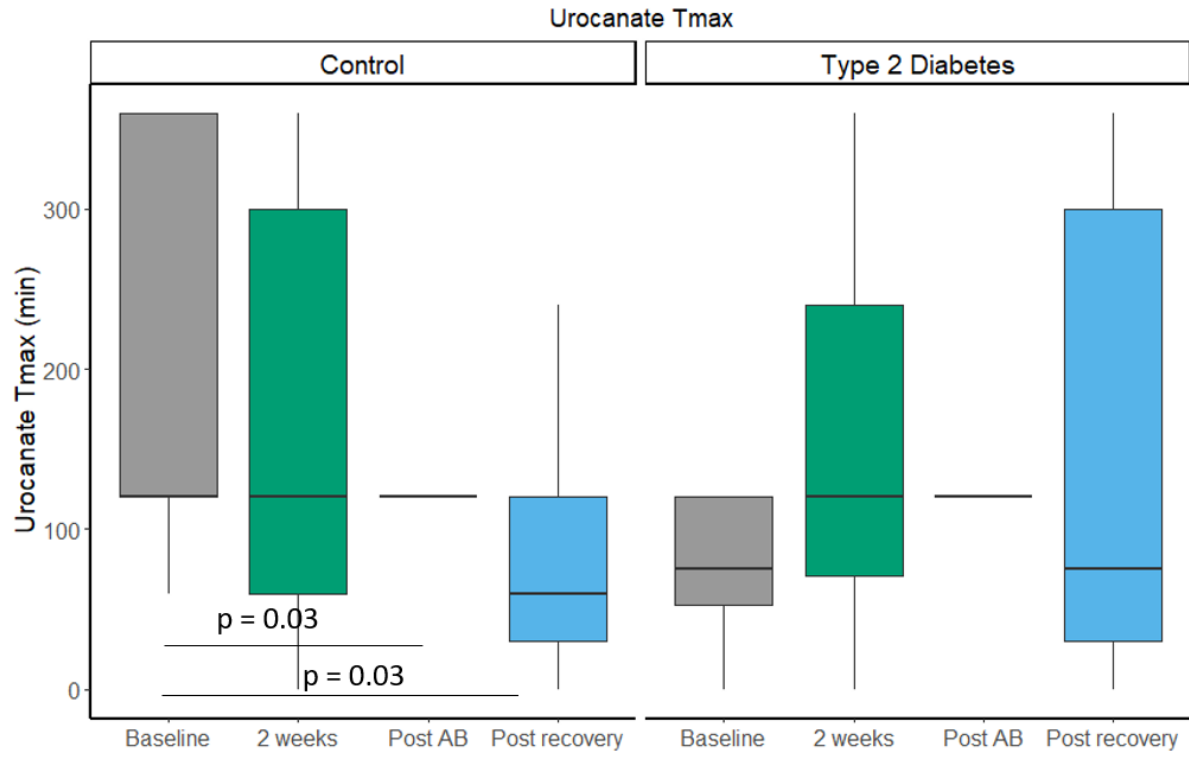

**Supplementary Figure 5.** Metabolite Tmax concentrations. A. Histidine Tmax. B. Imidazole Propionate Tmax C. Urocanate Tmax. Paired wilcox testing. FDR corrected p values.



A.

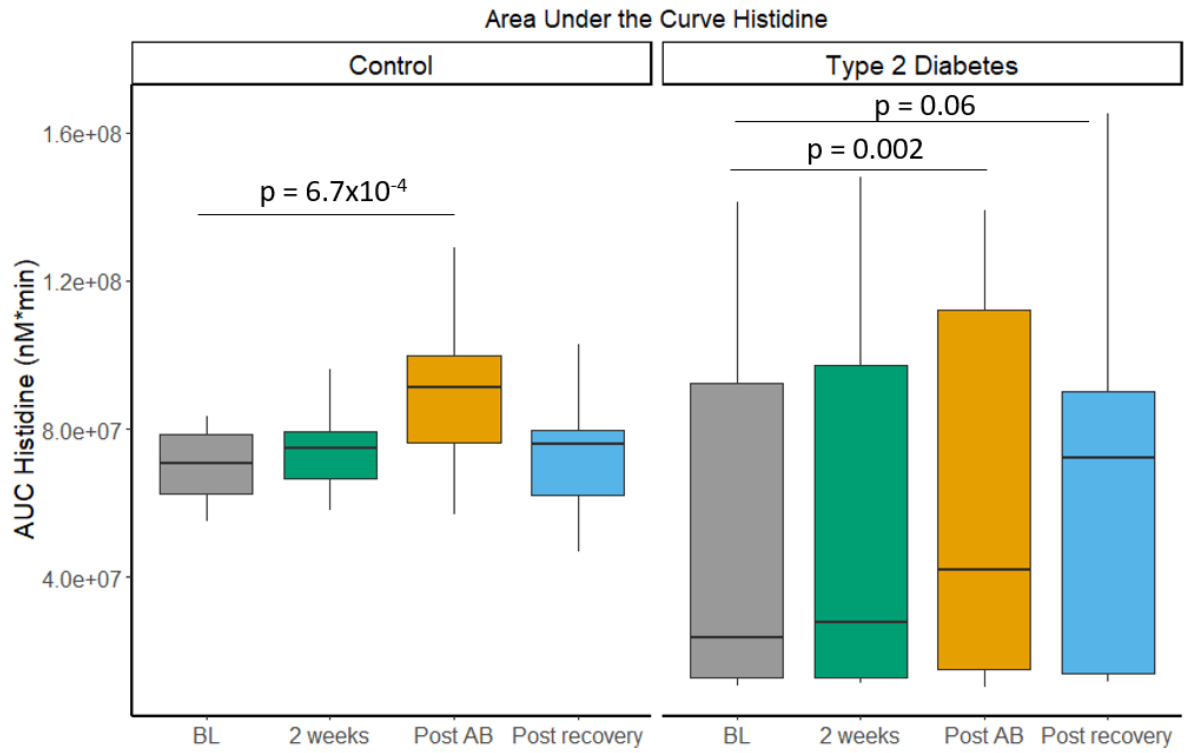

B.

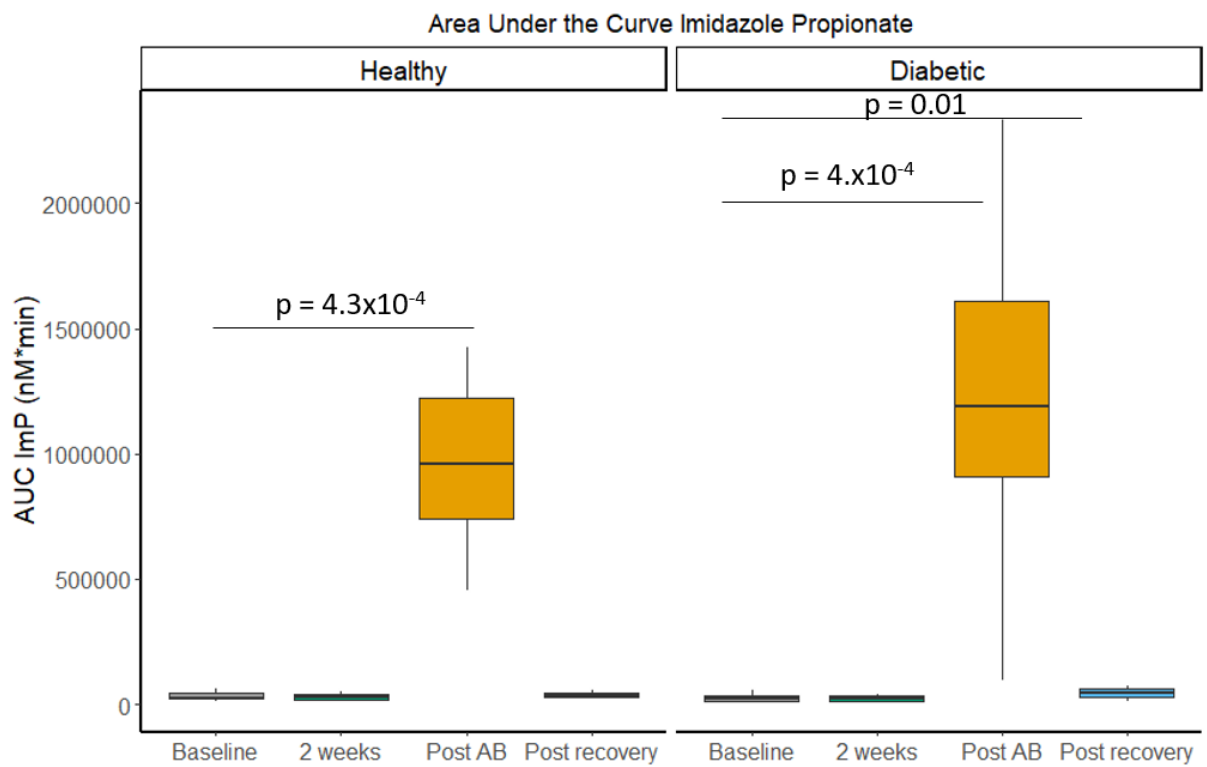

C.

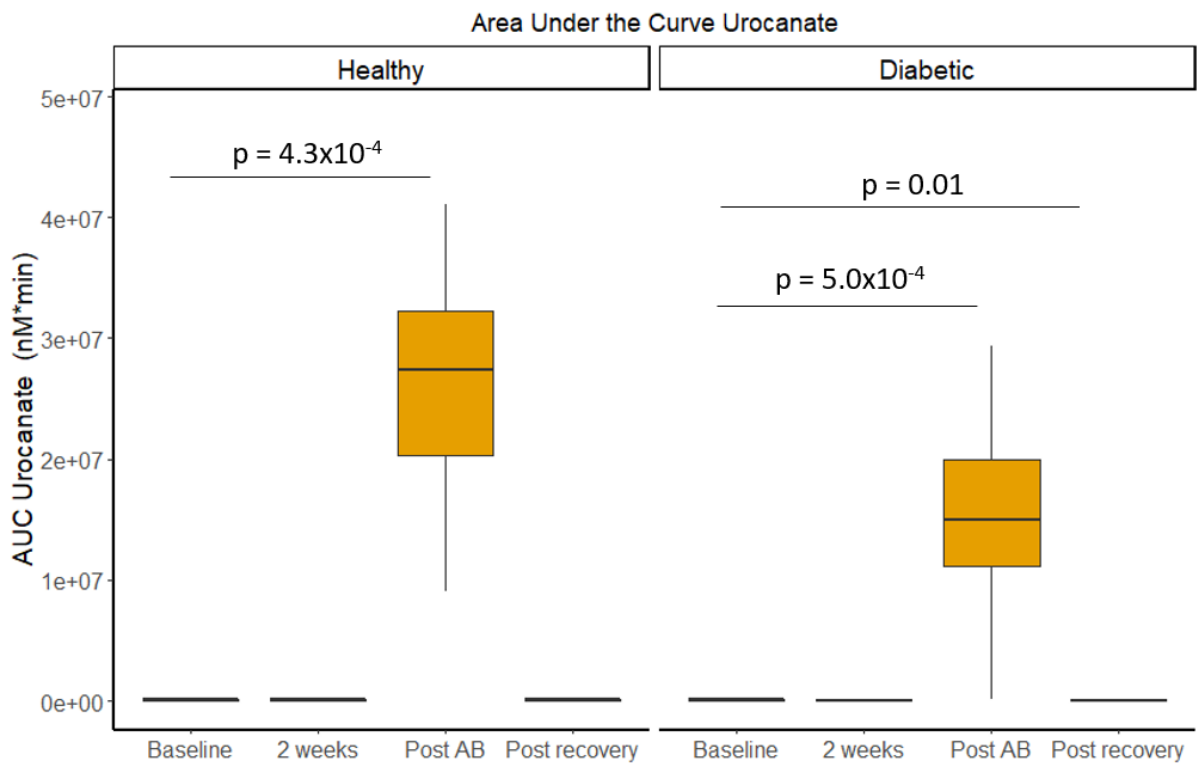

**Supplementary Figure 6.** Metabolite AUC concentrations. A. Histidine AUC. B. Imidazole Propionate AUC C. Urocanate AUC. Paired wilcox testing. FDR corrected p values.

A.

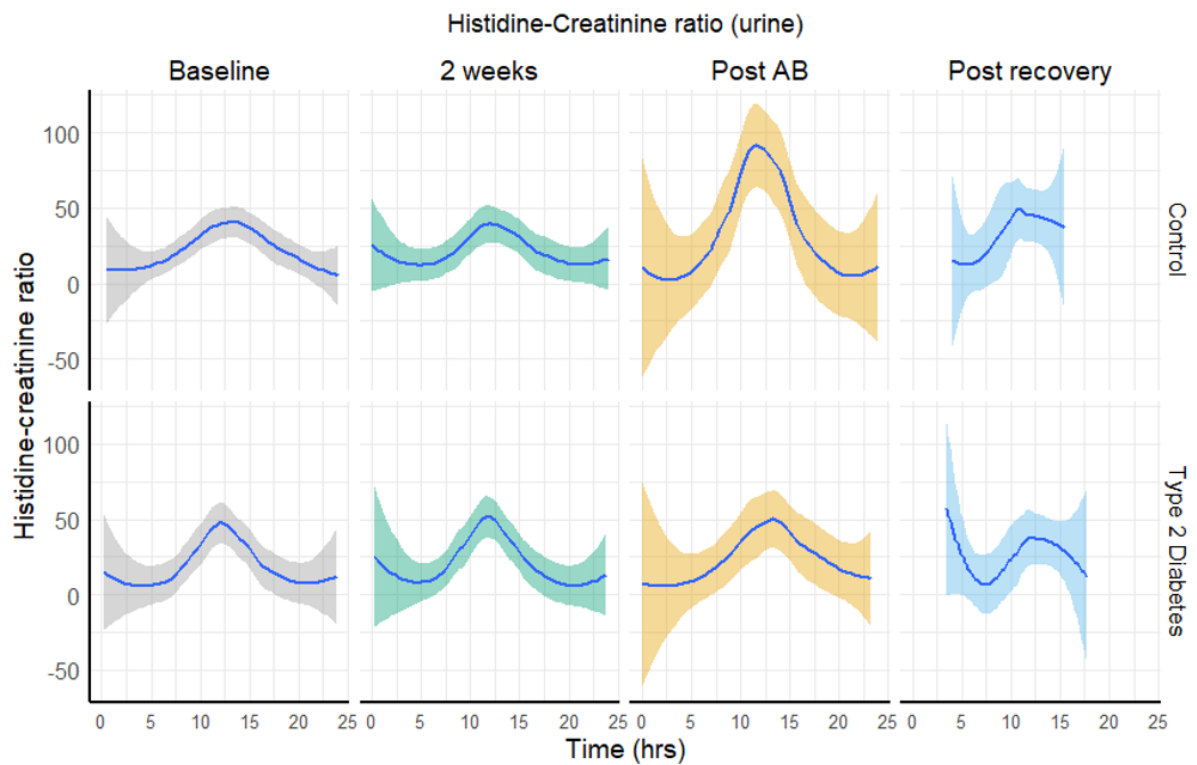

B.

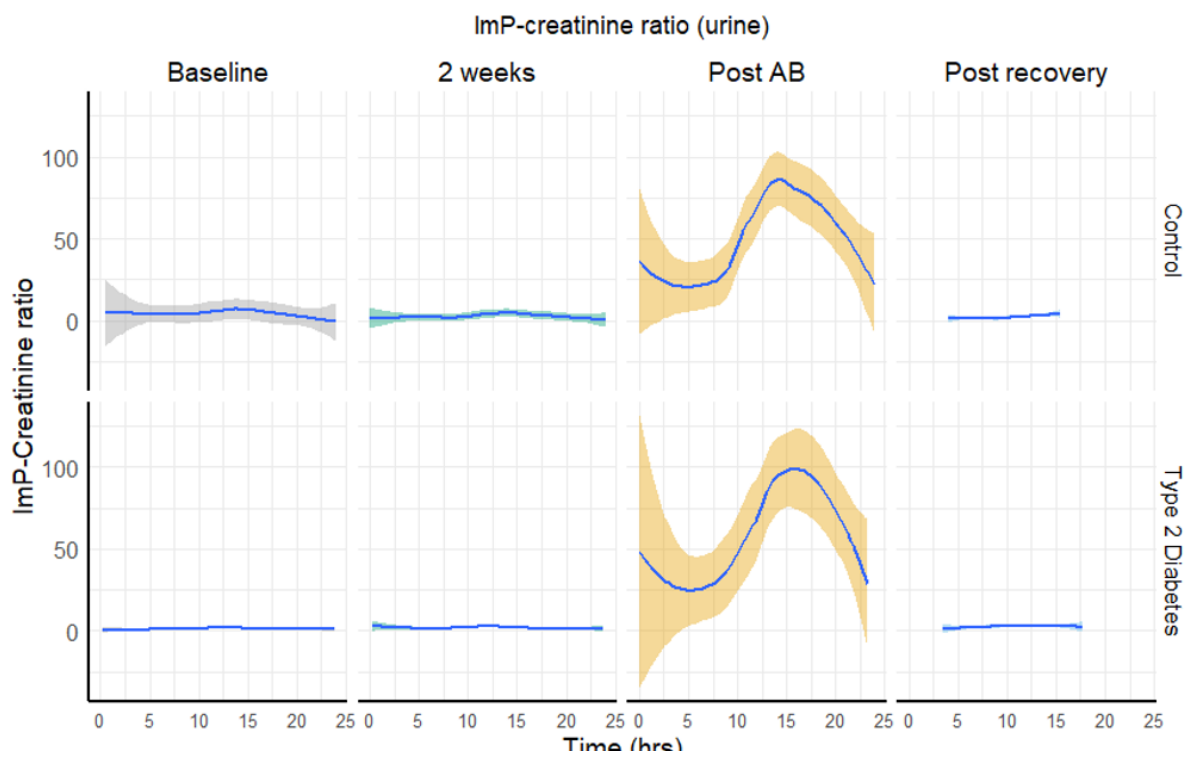

C.

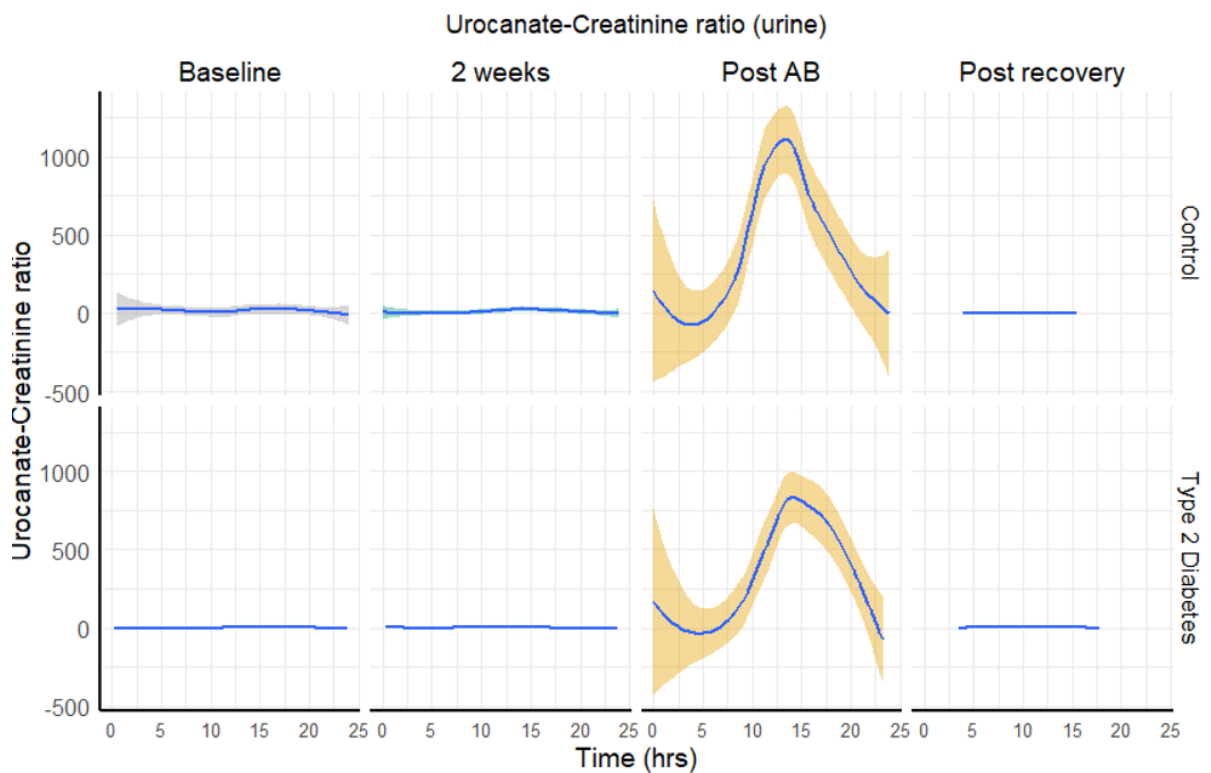

**Supplementary Figure 7.** Urine metabolite concentrations. A. Histidine-Creatinine ratio. B. Imidazole Propionate AUC C. Urocanate AUC. Data collected during 24 hrs after histidine challenge.

A.

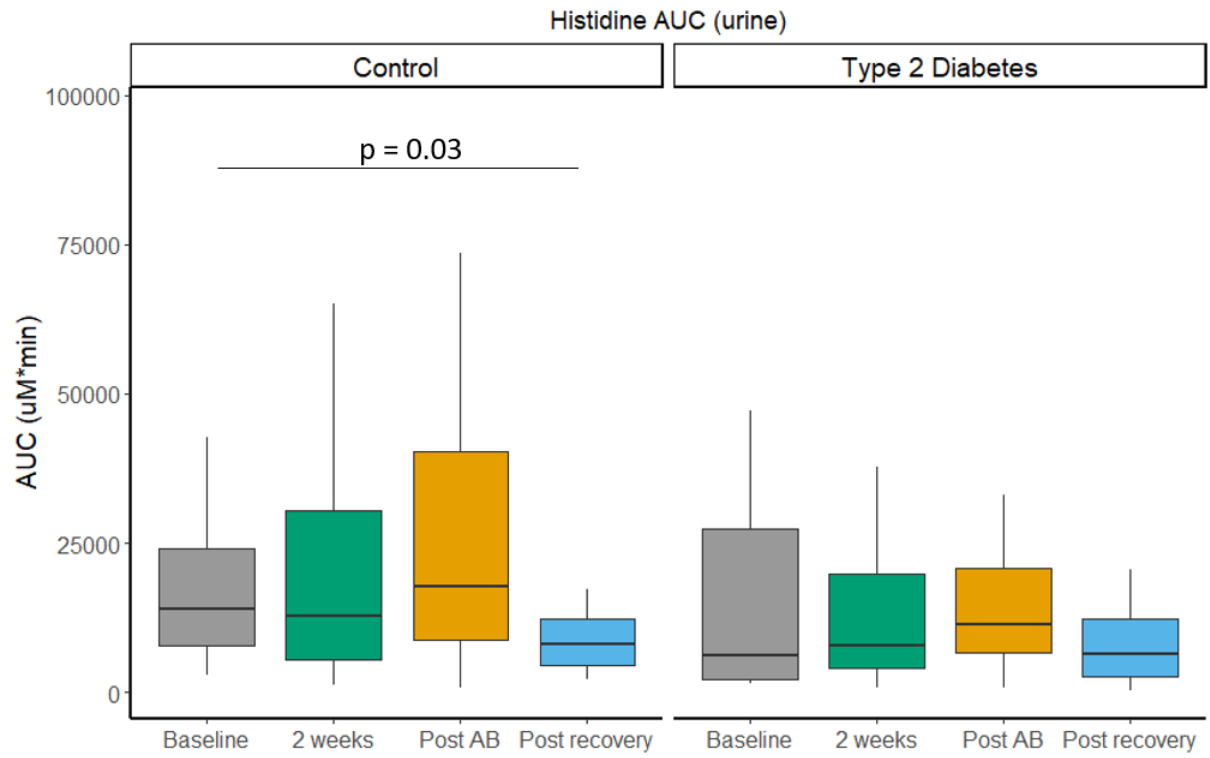

B.

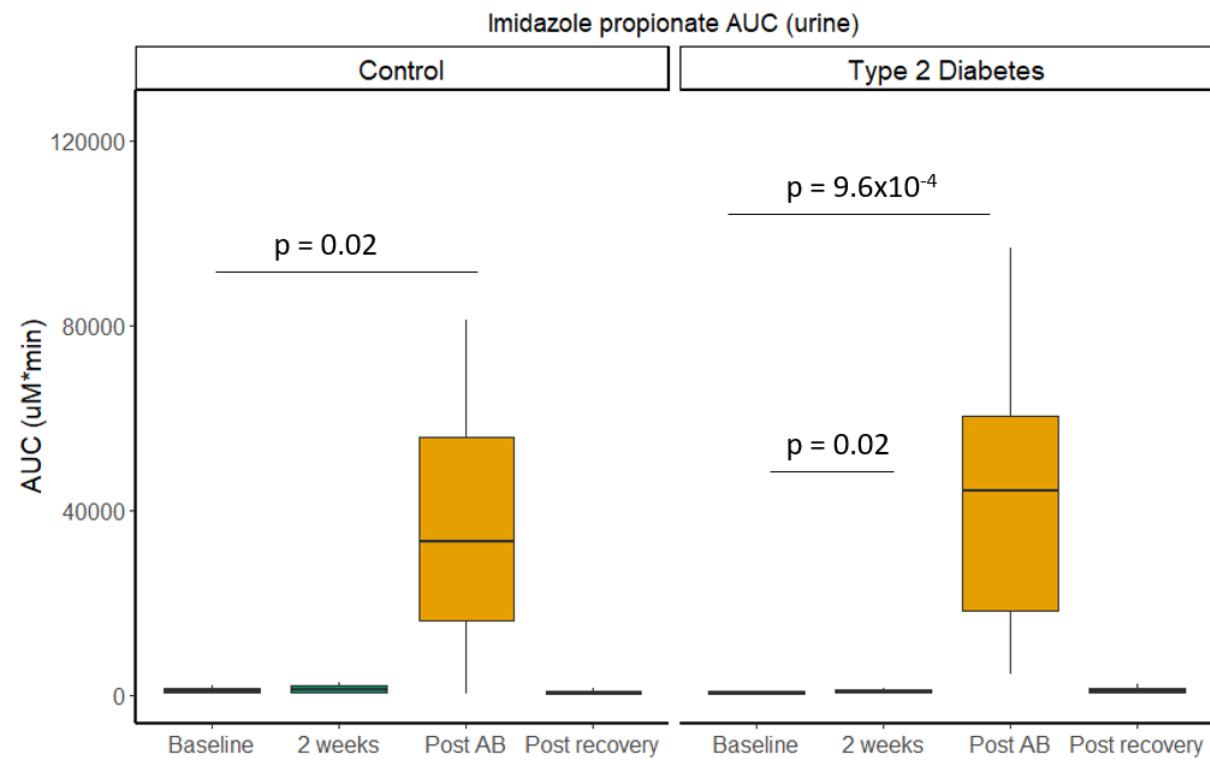

C.

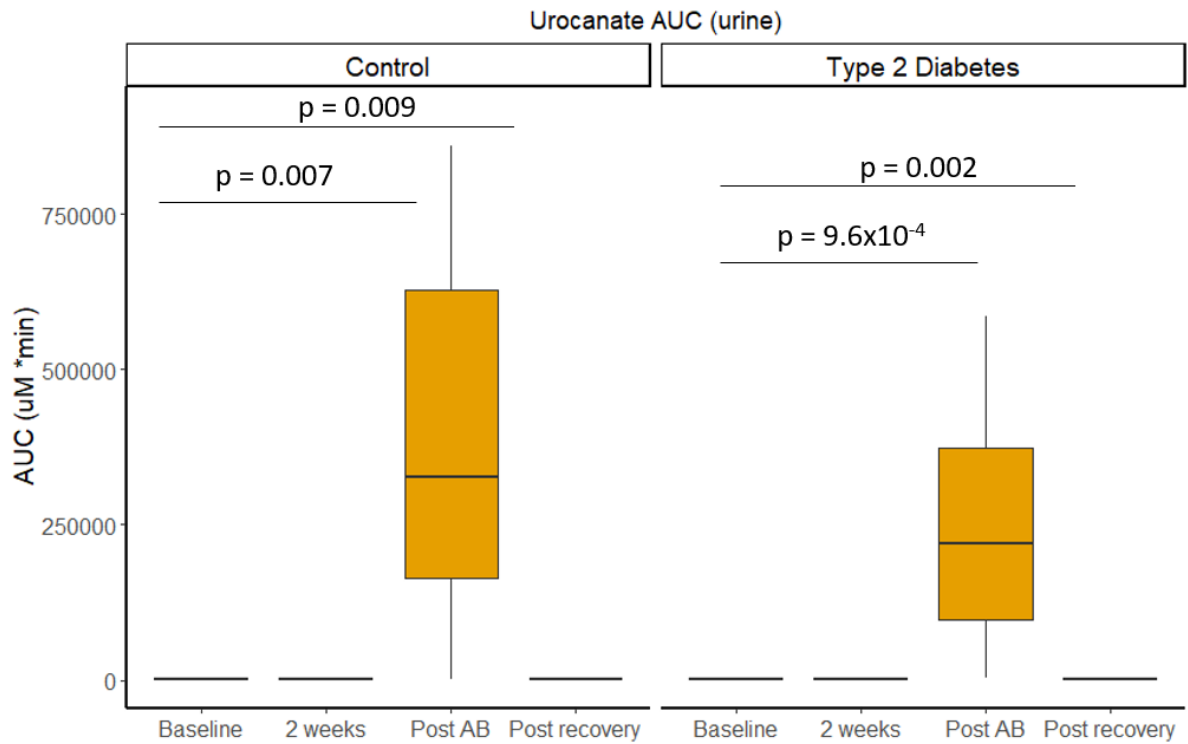

**Supplementary Figure 8.** Urine AUC metabolite concentrations. A. Histidine-Creatinine ratio. B. Imidazole Propionate AUC C. Urocanate AUC. Data collected during 24 hrs after histidine challenge. Paired wilcox testing. FDR corrected p values.

A.

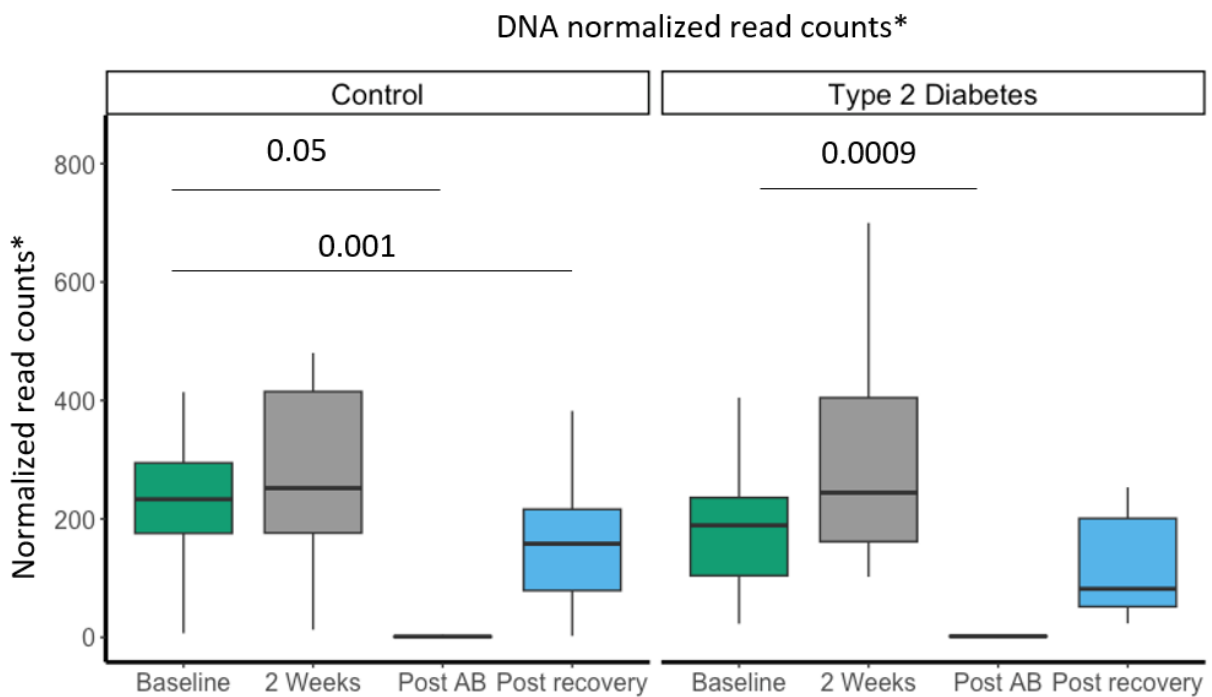

B.

B.

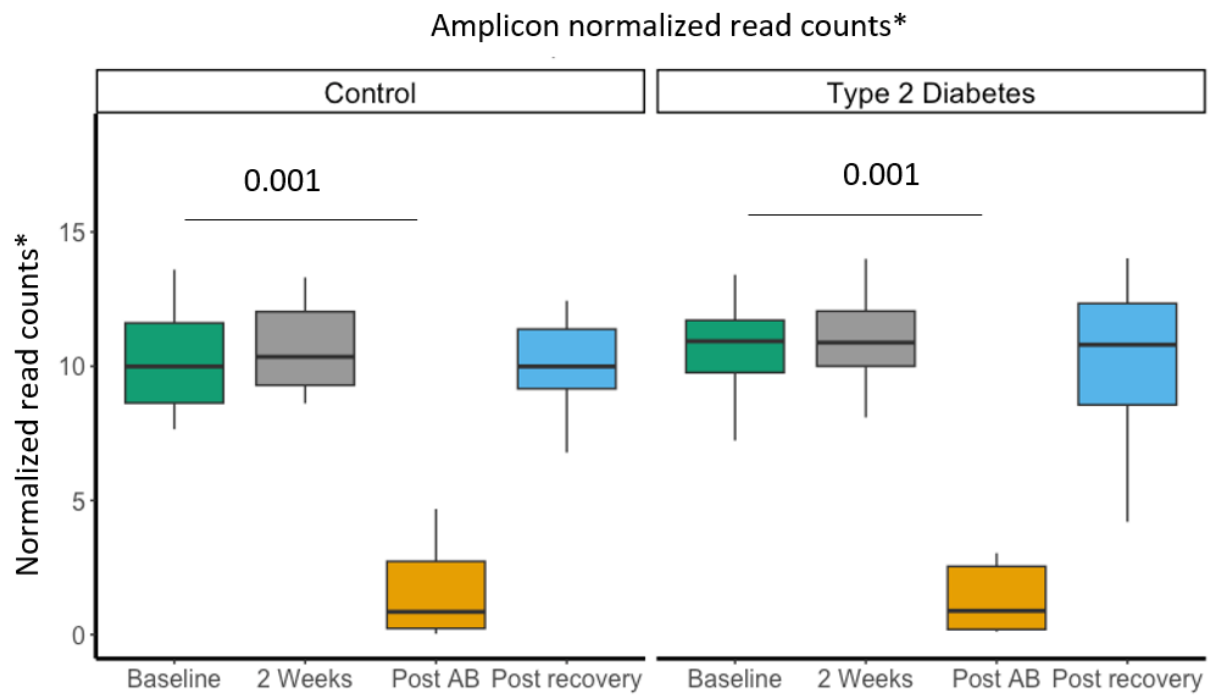

**Supplementary Figure 9.** Fecal DNA/Amplicon concentrations per visit. A. DNA normalized read counts B. Amplicon normalized read counts. \*DNA and Amplicon normalized read counts. Normalized for DNA extraction, amplicon yield and input weight. Paired wilcox testing. FDR corrected p values.

A.

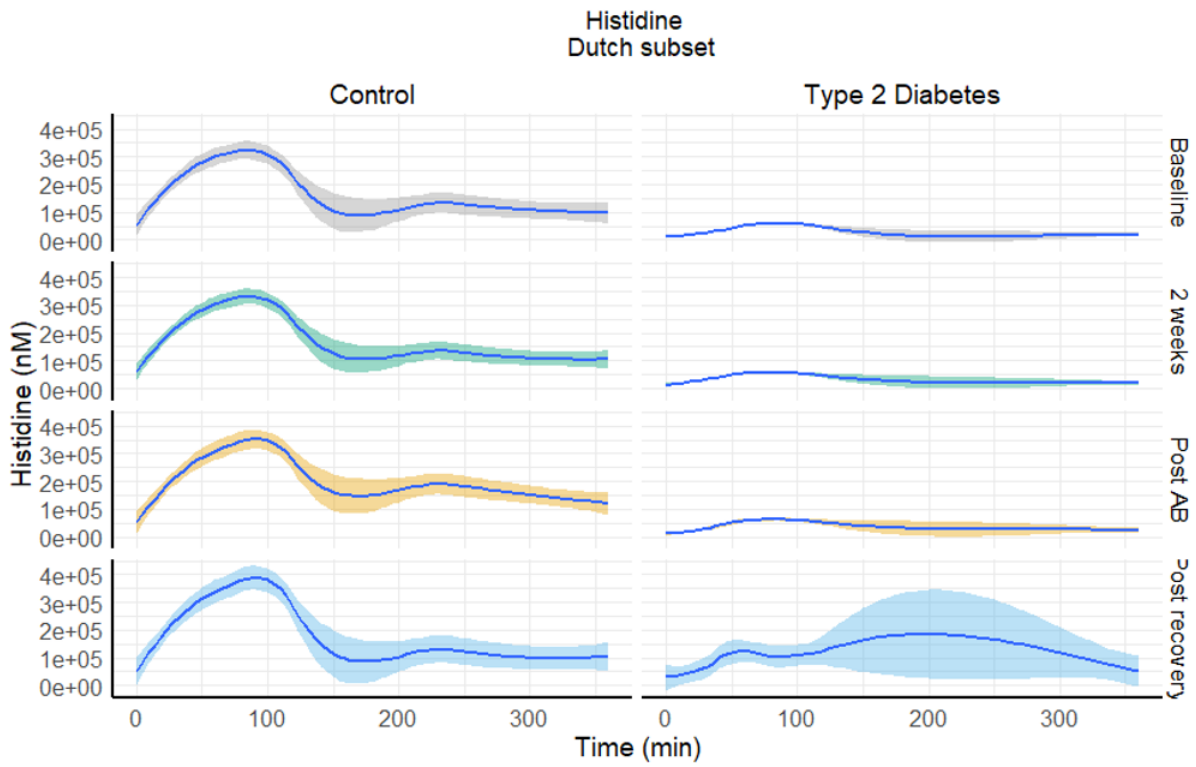

B.

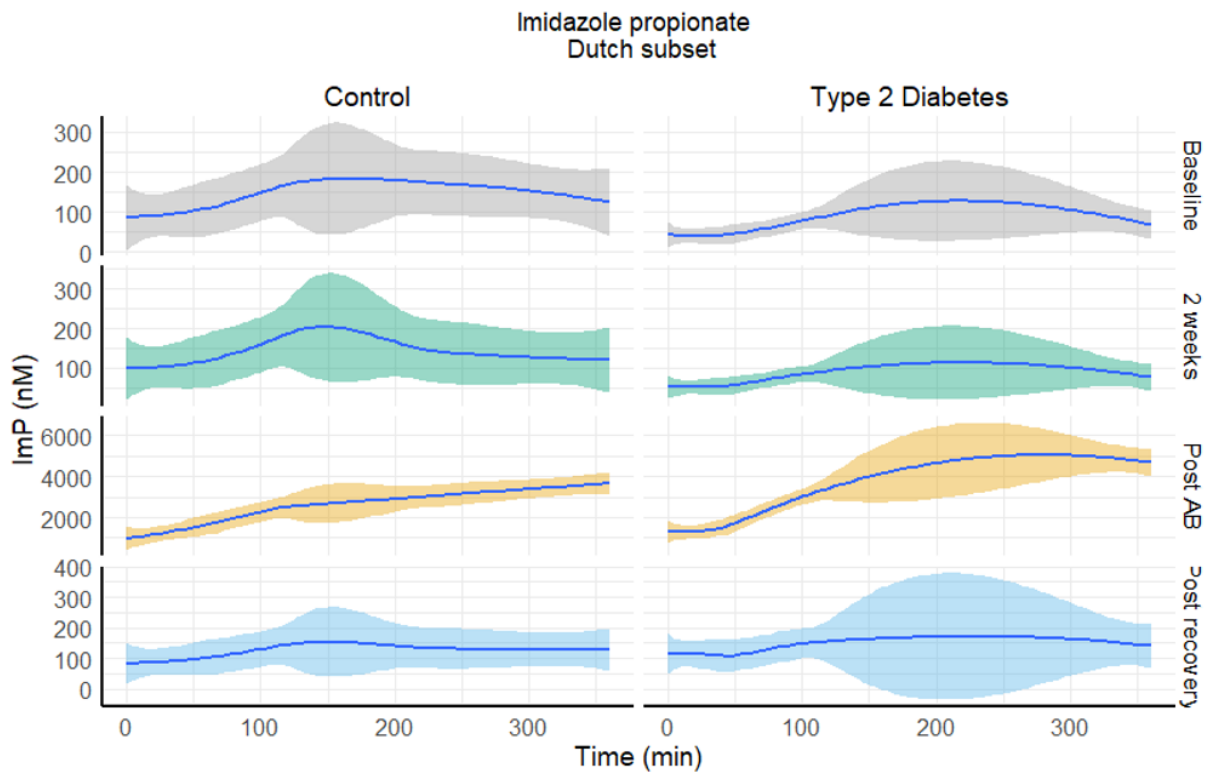

C.

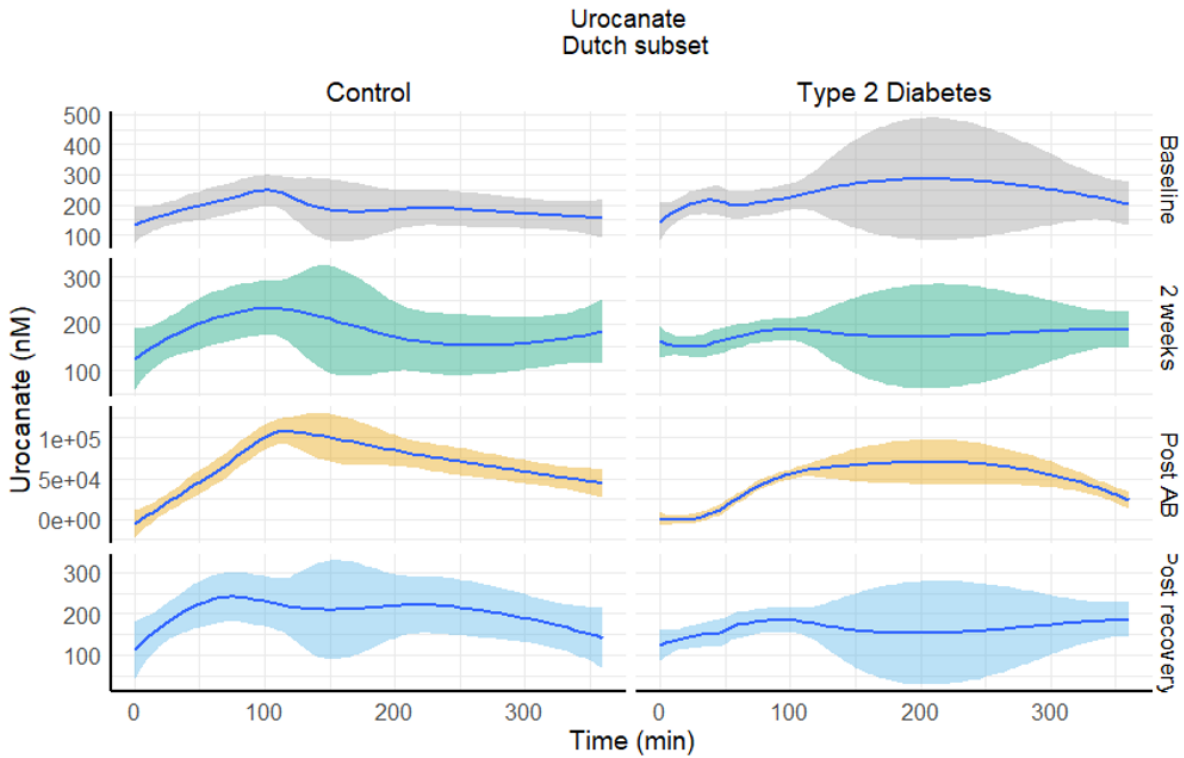

**Supplementary Figure 10.** Overview Metabolite kinetics in the Dutch subset (T2D: n = 10, control: n = 10) . A. Histidine B. Imidazole propionate. C. Urocanate Kinetics curves during 6 hours after histidine challenge measured by by ultra high performance liquid chromatography coupled to tandem mass spectrometry (UPLC-MS/MS) .

A.

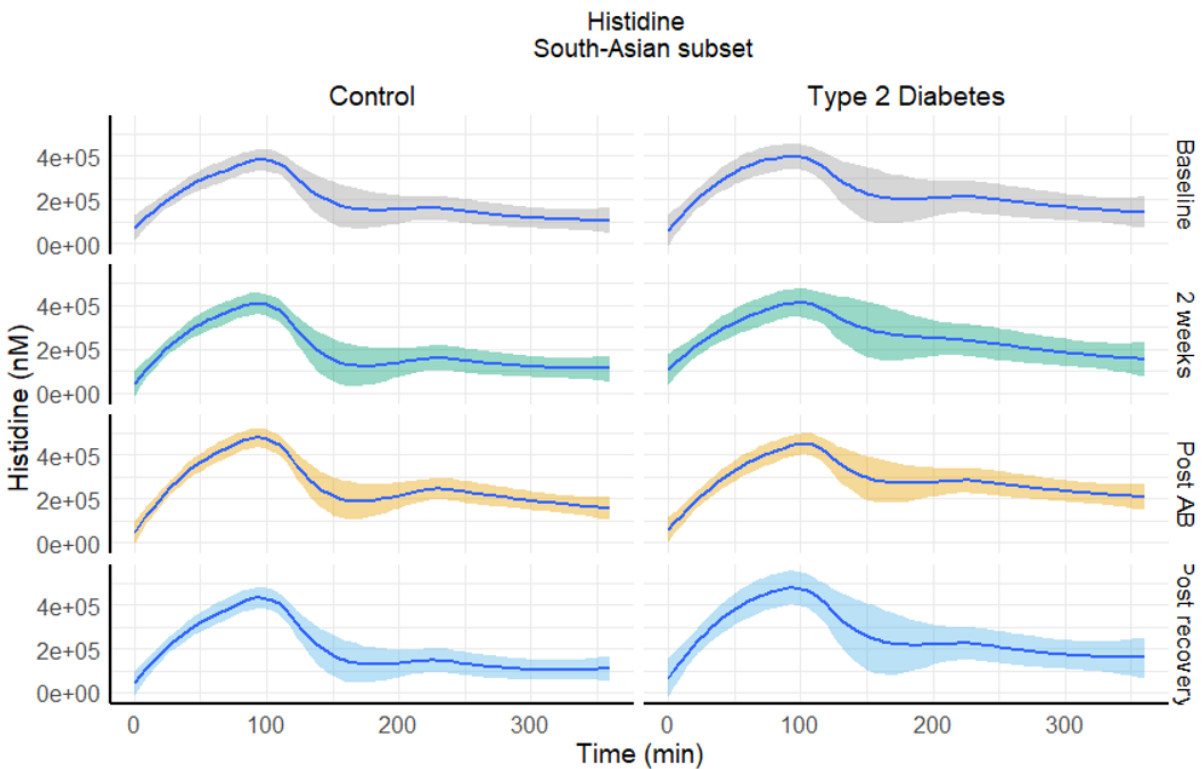



B.

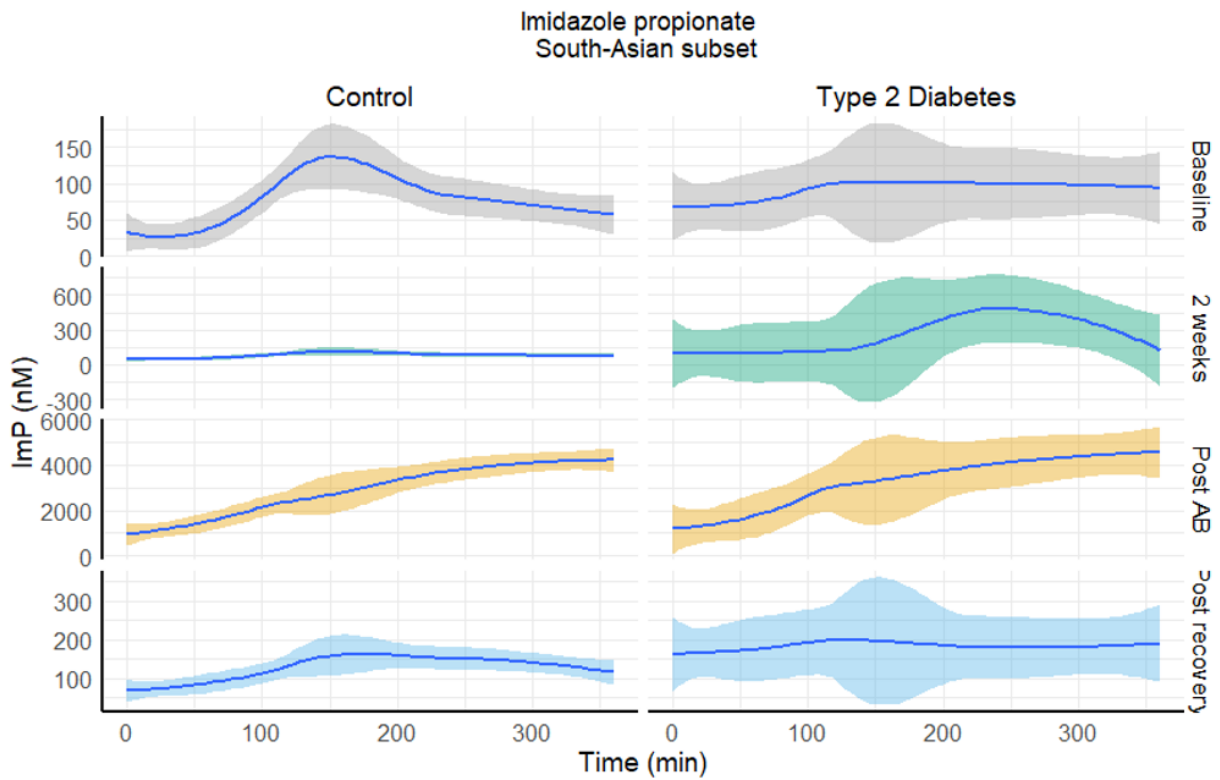

C.

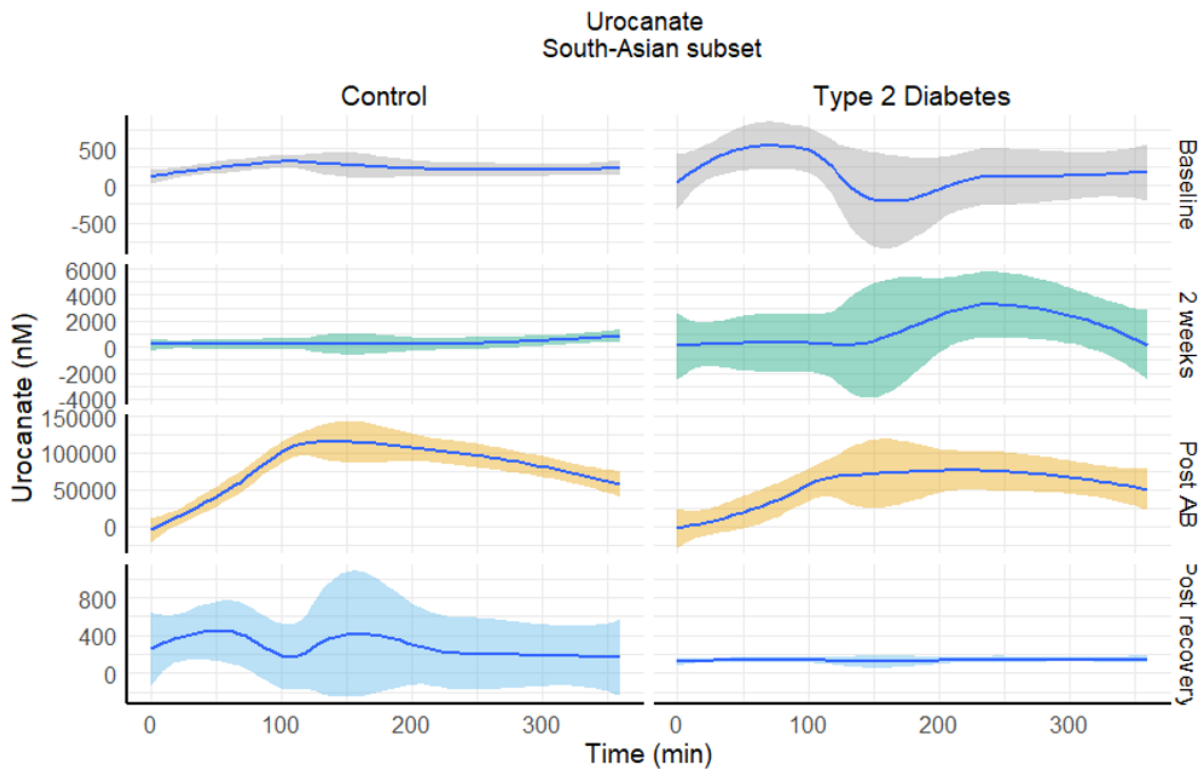

**Supplementary Figure 11.** Overview Metabolite kinetics in the South-Asian subset (T2D: n = 10, control: n = 9) . A. Histidine B. Imidazole propionate. C. Urocanate Kinetics curves during 6 hours after histidine challenge measured by by ultra high performance liquid chromatography coupled to tandem mass spectrometry (UPLC-MS/MS) .

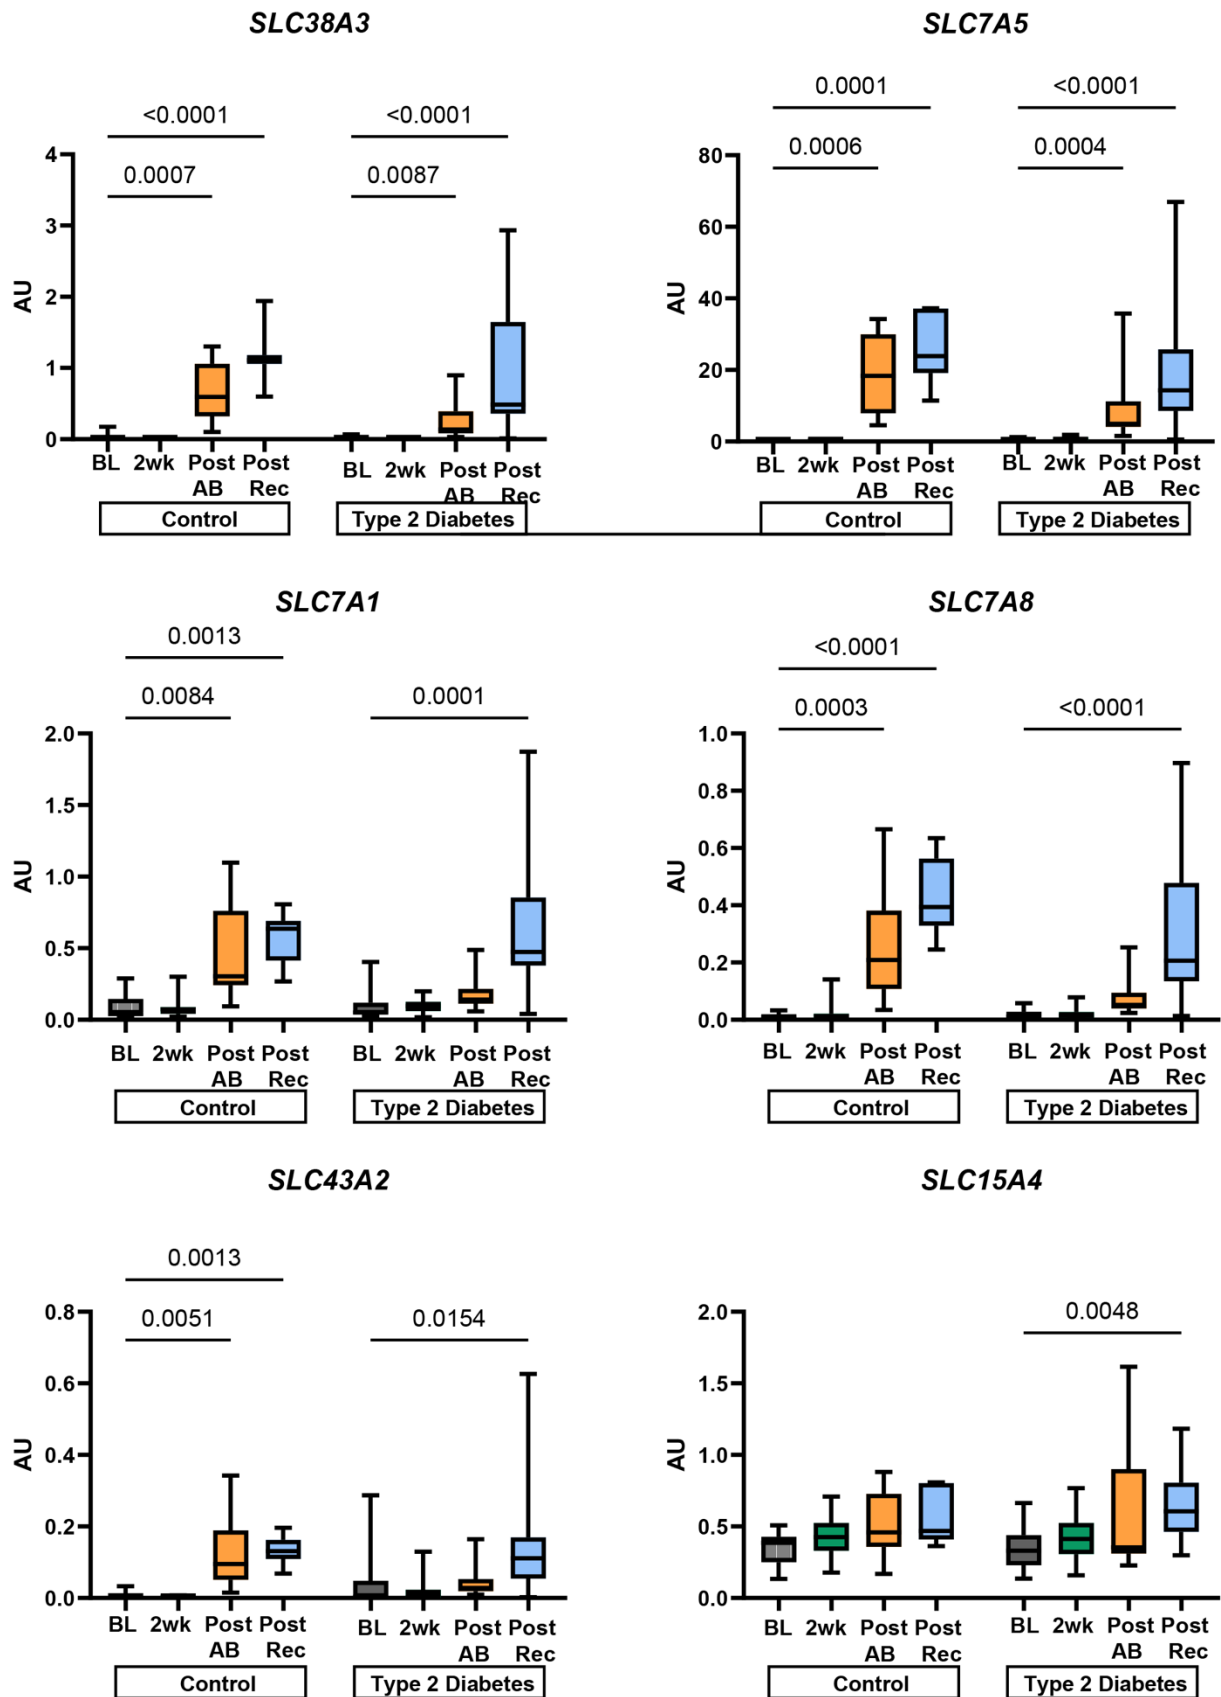

**Supplementary Figure 12.** Amino acid transporters qPCR at baseline (BL), after 2 weeks of histidine (2 wk), Post Antibiotics (Post AB) and Post recovery (Post Rec).
